# Supplementary material for: Influence of post-thaw culture duration on pregnancy outcomes in frozen blastocyst transfer cycles
Source: Research Square preprint supplement (doi:10.21203/rs.3.rs-1349549/v1), 2022-02-24
Supplement: Supplementary file 1 [file 6db9b3459367845c7bc601d0.docx]

**Influence of post-thaw culture duration on pregnancy outcomes in frozen blastocyst transfer cycles**

Supplementary Table 1 Patient demographic characteristics of day 5 transfer cycles reached or failed to end with live births.

| **Characteristic** | **LB** | **Non-LB** | ***P* value** |
| --- | --- | --- | --- |
| **n=436** | **n=332** |
| Age (years) | 30.5 ± 3.8 | 31.5 ± 4.3 | <0.001 |
| Type of infertility, n (%) |  |  | 0.004 |
| Primary | 177 (40.6) | 101 (30.4) |  |
| Secondary | 259 (59.4) | 231 (69.6) |  |
| Duration of infertility (years) | 1.5 ± 0.6 | 1.6 ± 0.7 | 0.135 |
| Duration of infertility, n (%) |  |  | 0.301 |
| ≤2 | 254 (58.3) | 179 (53.9) |  |
| 3-5 | 146 (33.5) | 116 (34.9) |  |
| ≥6 | 36 (8.3) | 37 (11.1) |  |
| Cause of infertility, n (%) |  |  | 0.379 |
| female factor | 238 (54.6) | 170 (51.2) |  |
| male factor | 72 (16.5) | 66 (19.9) |  |
| combined factor | 103 (23.6) | 72 (21.7) |  |
| unknown factor | 23 (5.3) | 24 (7.2) |  |
| BMI (kg/m2) | 22.3 ± 3.0 | 22.4 ± 3.5 | 0.678 |
| Basal FSH (mIU/mL) | 7.3 ± 1.7 | 7.8 ± 2.2 | 0.003 |
| AMH (ng/ml)a | 5.0 (3.1-7.8) | 4.3 (2.7-7.2) | 0.015 |
| Endometrial thickness (mm) | 9.6 ± 1.7 | 9.2 ± 1.8 | 0.003 |
| Endometrial preparation protocol, n (%) |  |  | 0.370 |
| NC | 102 (23.4) | 87 (26.2) |  |
| AC | 334 (76.6) | 245 (73.8) |  |
| Number of transferred embryos | 1.3 ± 0.5 | 1.2 ± 0.4 | <0.001 |
| Number of good-quality embryo, n (%) |  |  | <0.001 |
| 0 | 58 (13.3) | 82 (24.7) |  |
| 1 | 299 (68.6) | 230 (69.3) |  |
| 2 | 79 (18.1) | 20 (6.0) |  |
| Culture duration |  |  | 0.771 |
| long | 220 (50.5) | 164 (49.4) |  |
| short | 216 (49.5) | 168 (50.6) |  |

Note: a Data are presented as median (first quartile, third quartile). Other data are presented as mean ± SD or n (%). LB, live birth; BMI, body mass index; FSH, follicle stimulating hormone; AMH, anti-Müllerian hormone; NC, natural cycle; AC, artificial cycle.

Supplementary Table 2 Patient demographic characteristics of day 6 transfer cycles reached or failed to end with live births.

| **Characteristic** | **LB** | **Non-LB** | ***P* value** |
| --- | --- | --- | --- |
| **(n=380)** | **(n=491)** |
| Age (years) | 30.9 ± 3.9 | 31.5 ± 4.2 | 0.057 |
| Type of infertility, n (%) |  |  | 0.173 |
| Primary | 177 (46.6) | 206 (42.0) |  |
| Secondary | 203 (53.4) | 285 (58.0) |  |
| Duration of infertility, n (%) |  |  | 0.993 |
| ≤2 | 185 (48.7) | 238 (48.5) |  |
| 3-5 | 135 (35.5) | 174 (35.4) |  |
| ≥6 | 60 (15.8) | 79 (16.1) |  |
| Cause of infertility, n (%) |  |  | 0.008 |
| female factor | 186 (48.9) | 261 (53.2) |  |
| male factor | 97 (25.5) | 80 (16.3) |  |
| combined factor | 77 (20.3) | 116 (23.6) |  |
| unknown factor | 20 (5.3) | 34 (6.9) |  |
| BMI (kg/m2) | 22.4 ± 3.2 | 22.2 ± 3.0 | 0.324 |
| Basal FSH (mIU/mL) | 7.4 ± 2.1 | 7.6 ± 2.0 | 0.193 |
| AMH (ng/ml) | 4.1 (2.5-6.7) | 4.0 (2.3-6.5) | 0.602 |
| Endometrial thickness (mm) | 9.5 ± 1.8 | 9.4 ± 1.7 | 0.278 |
| Endometrial preparation protocol, n (%) |  |  | 0.439 |
| NC | 108 (28.4) | 128 (26.1) |  |
| AC | 272 (71.6) | 363 (73.9) |  |
| Number of transferred embryos | 1.5 ± 0.5 | 1.4 ± 0.5 | 0.021 |
| Number of good-quality embryo, n (%) |  |  | <0.001 |
| 0 | 148 (38.9) | 305 (62.1) |  |
| 1 | 182 (47.9) | 157 (32.0) |  |
| 2 | 50 (13.2) | 29 (5.9) |  |
| Culture duration |  |  | <0.001 |
| long | 116 (30.5) | 211 (43.0) |  |
| short | 264 (69.5) | 280 (57.0) |  |
